# Supplementary material for: Synthesis and Antitumor Activity of New Group 3 Metallocene Complexes
Source: PubMed Central journal article supplement (PMC6154682; doi:10.3390/molecules22040526), 2017-03-28
Supplement: molecules-22-00526-s001.pdf [file molecules-22-00526-s001.pdf]

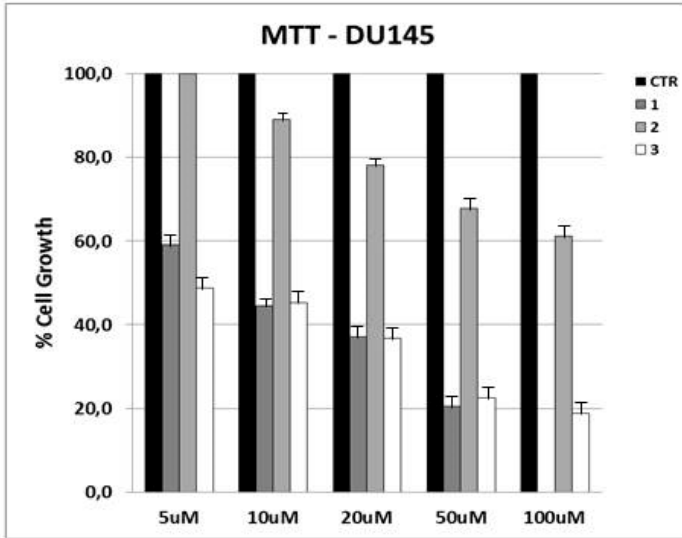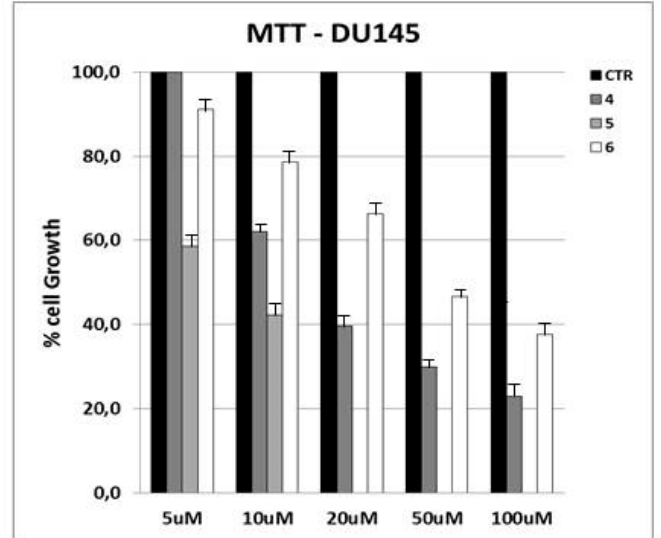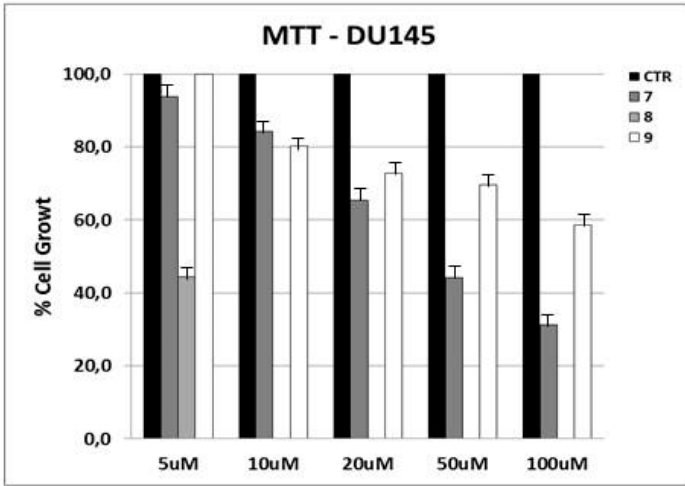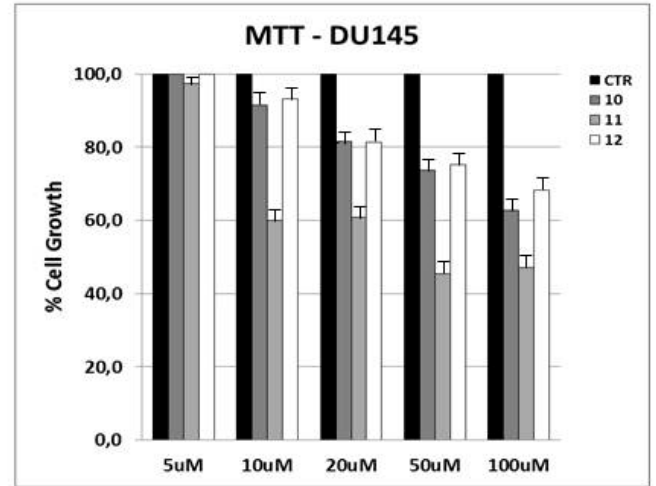

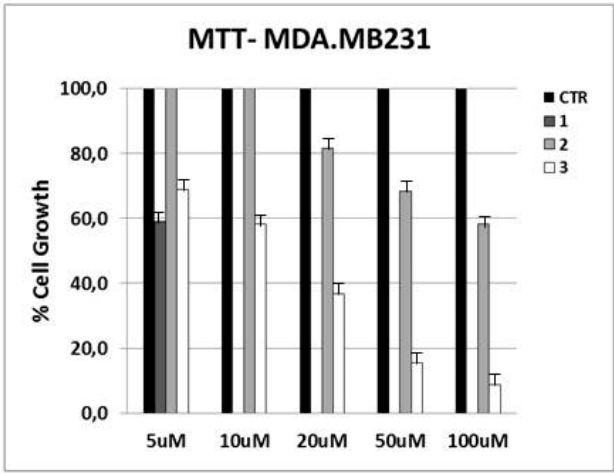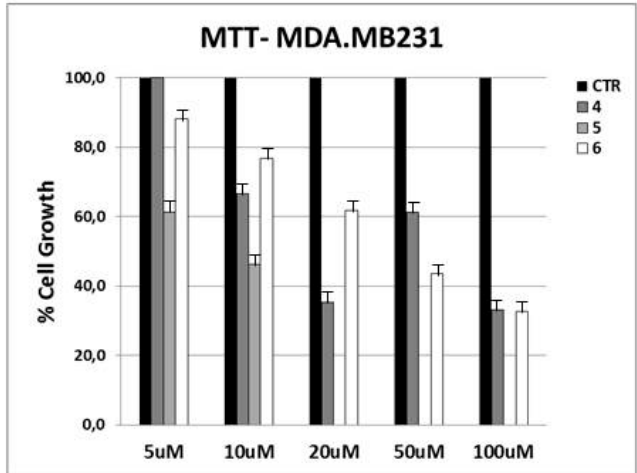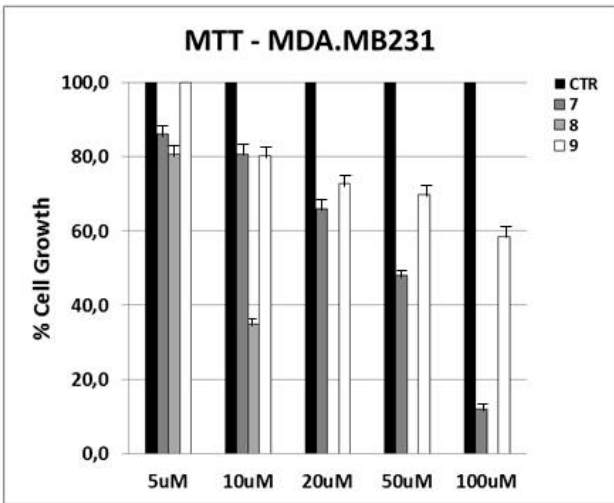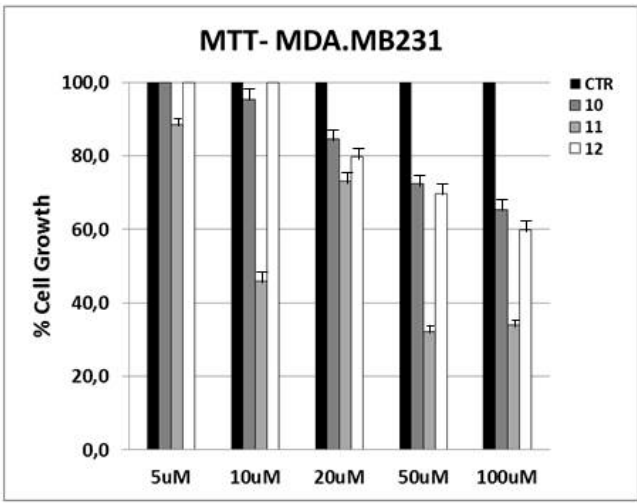

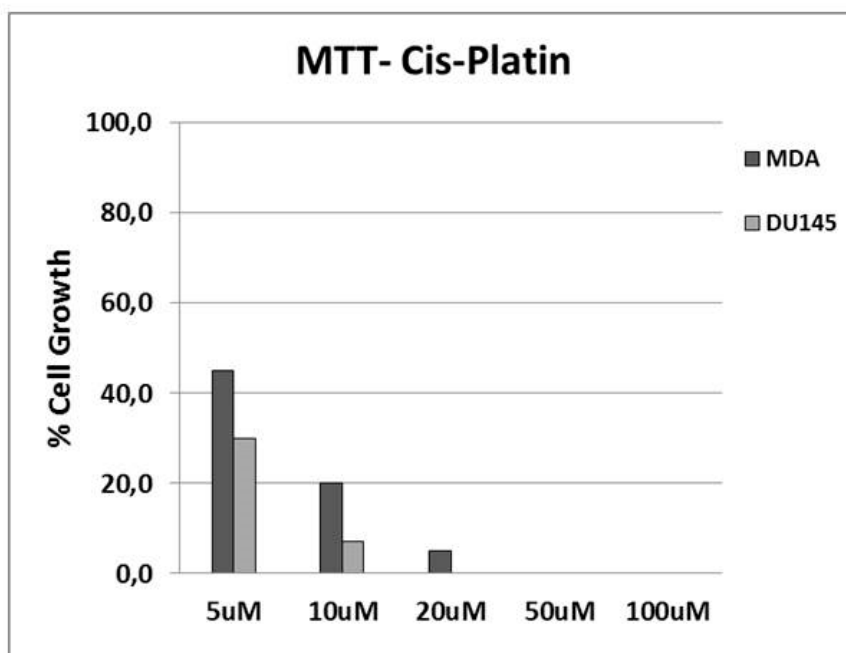

**Supplementary Information:** Evaluation of the cytotoxic activity of compounds was evaluated as IC<sub>50</sub> ( $\mu\text{M}$ ) responses from  $5\mu\text{M}$  to  $100\mu\text{M}$  of compounds 1-12 in MDA.MB231, human Triple Negative Breast cancer (a), and DU145, human Prostate cancer not hormone sensitive (b), Cisplatin IC<sub>50</sub> on our cancer cell lines (c), defined by the MTT assay. Cell growth was expressed as percentage of cells treated with different concentrations, distinct compounds respect to cells treated for 48 hours.
